# Supplementary material for: Deciphering the autophagy regulatory network via single-cell transcriptome analysis reveals a requirement for autophagy homeostasis in spermatogenesis
Source: PubMed Central journal article supplement (PMC7978313; doi:10.7150/thno.55645), 2021-03-05
Supplement: thnov11p5010s1.pdf [file thnov11p5010s1.pdf]

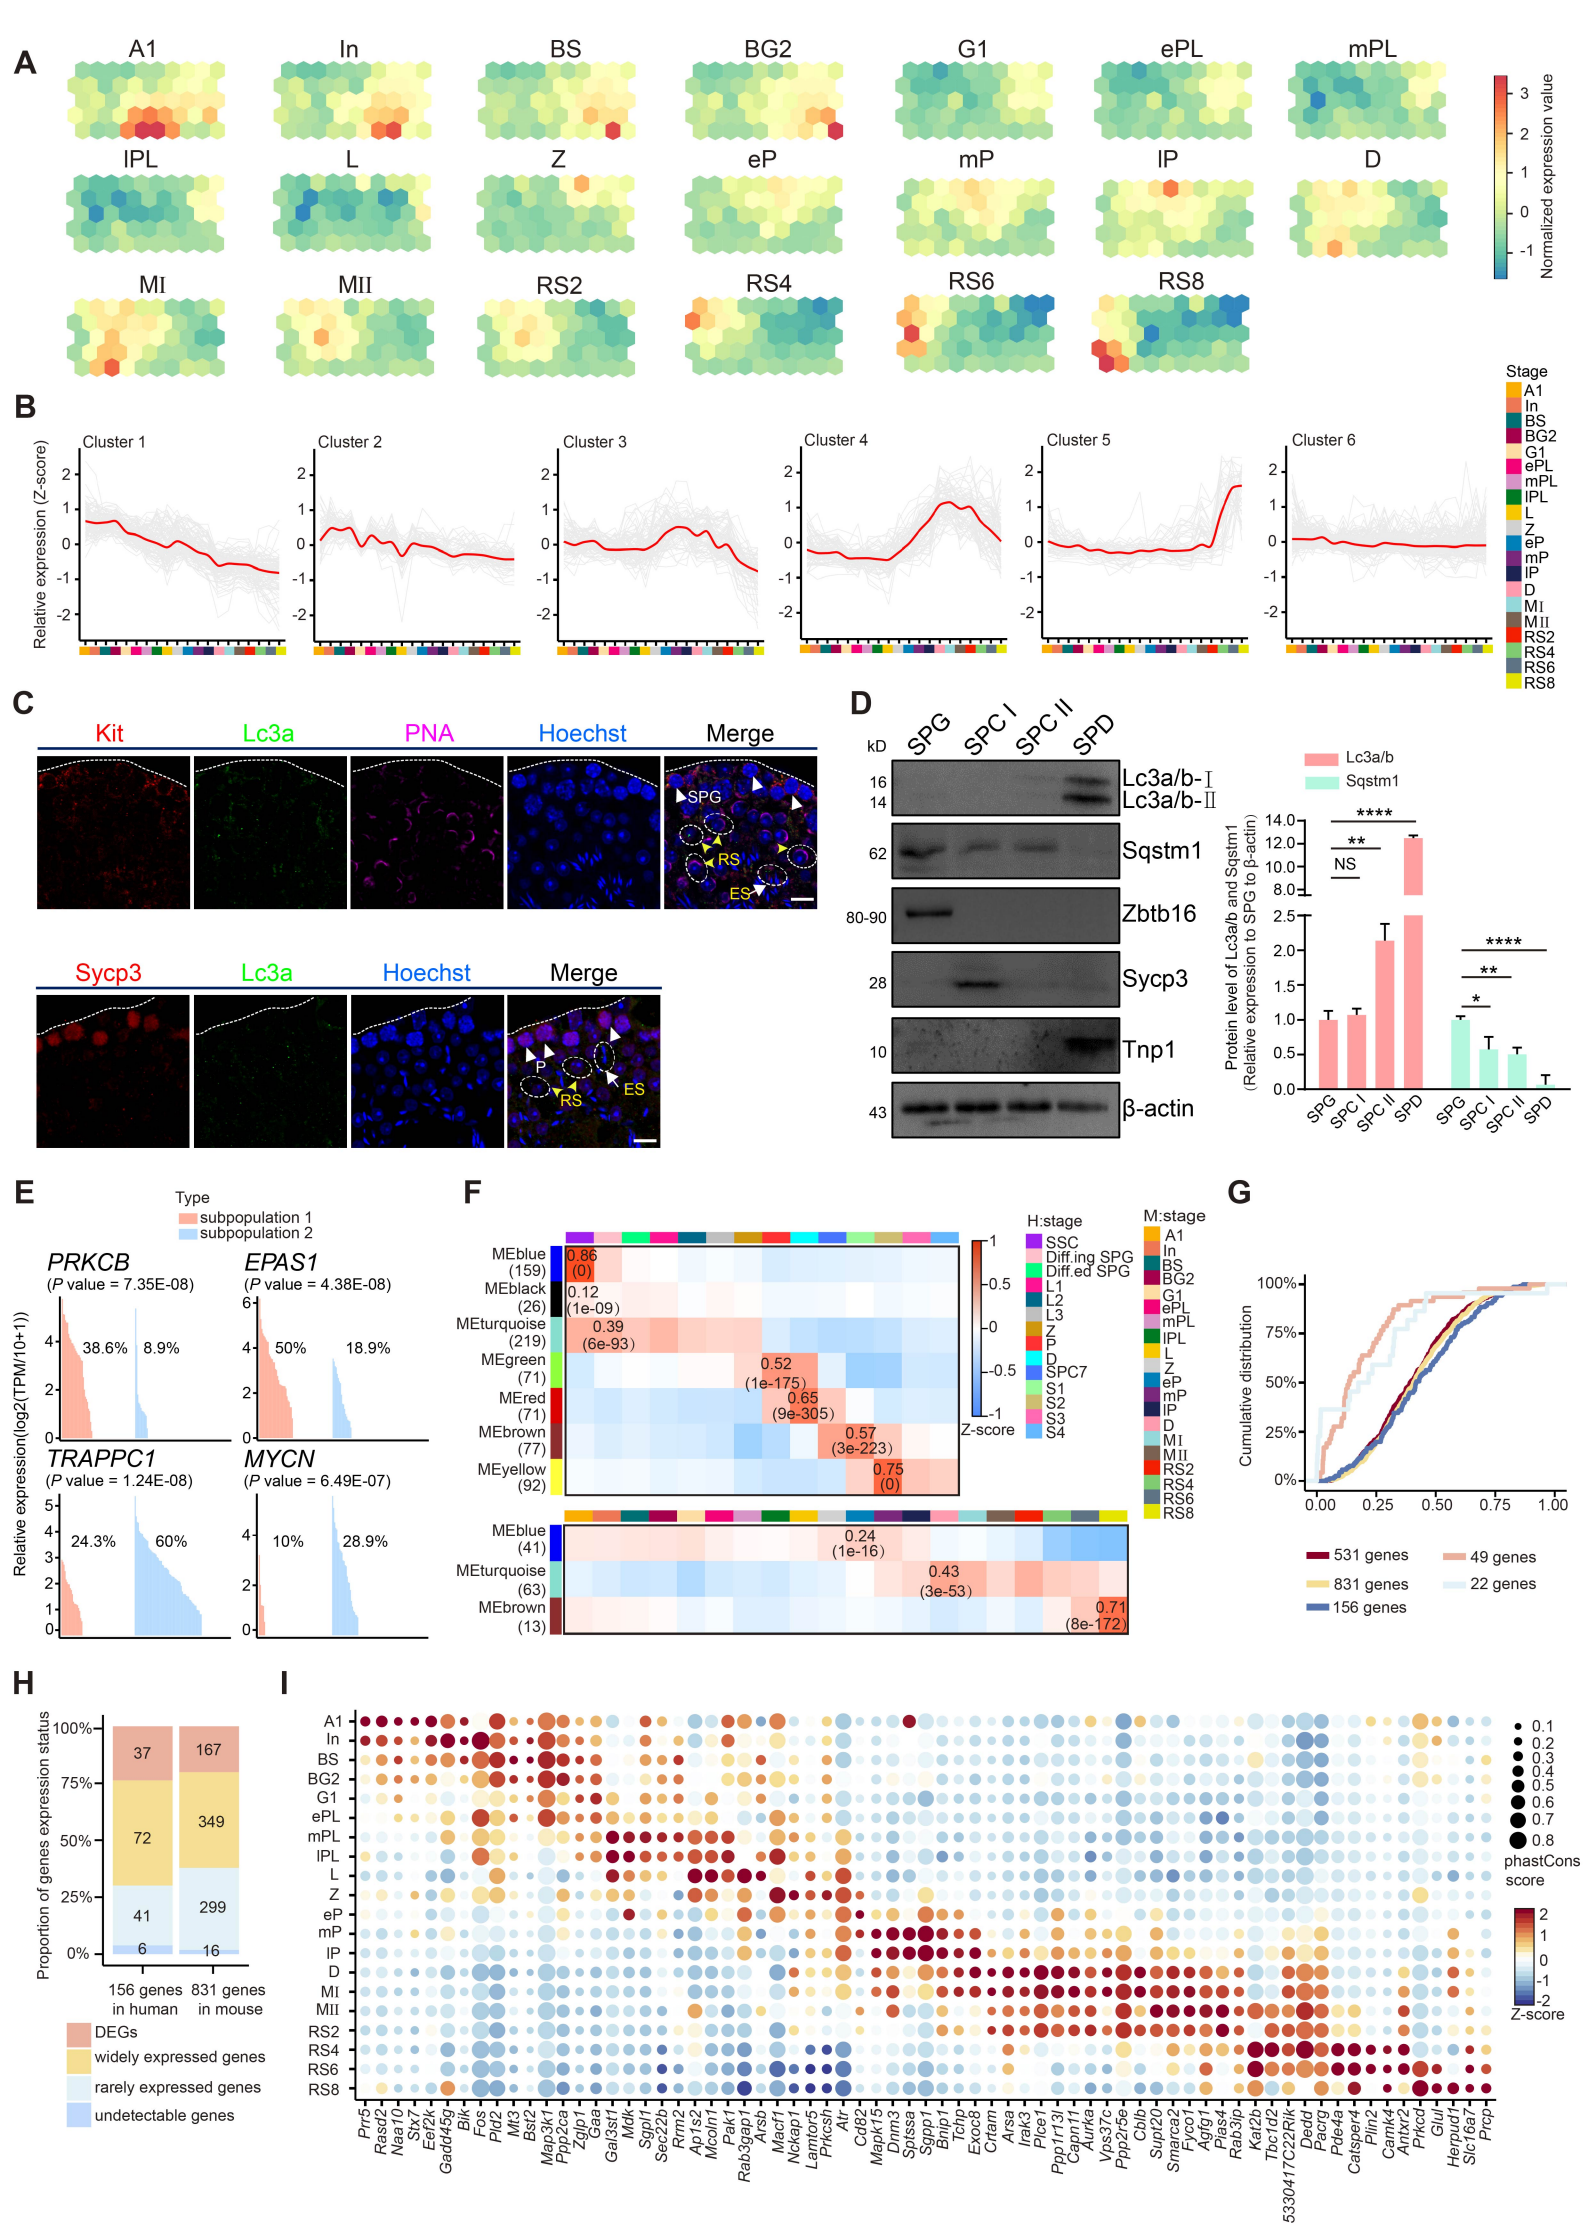

**Figure S1. Global transcriptional dynamics of autophagic genes in spermatogenesis.**

(A) Temporal expression of autophagic genes represented by a self-organizing map algorithm; a distinct set of autophagy-related genes are enriched in each cell cluster. A gradient of green to red indicates low to high normalized expression values. Type A1 spermatogonia (A1), intermediate spermatogonia (In), S phase type B spermatogonia (BS), G2/M phase type B spermatogonia (BG2), G1 phase preleptotene (G1), early S phase preleptotene (ePL), middle S phase preleptotene (mPL), late S phase preleptotene (lPL), leptotene (L), zygotene (Z), early pachytene (eP), middle pachytene (mP), late pachytene (lP), diplotene (D), metaphase I (MI), metaphase II (MII), steps 1–2 spermatids (RS2), steps 3–4 spermatids (RS4), steps 5–6 spermatids (RS6), steps 7–8 spermatids (RS8).

(B) K-means clustering of differentially expressed autophagic genes throughout mouse spermatogenesis into six individual clusters.

(C) Immunofluorescence of Kit (red, top) and Sycp3 (red, bottom) co-stained with Lc3a (green) and PNA (pink) in adult mouse testicular paraffin sections from 8-week-old mice. SPG, spermatogonia; P, pachytene; RS, round spermatids; ES, elongated spermatids. The scale bars represent 10  $\mu$ m.

(D) Western blotting of Lc3a/b, Sqstm1, Zbtb16, Sycp3 and Tnp1 in the spermatogonium (SPG); primary spermatocyte (SPC I); secondary spermatocyte (SPC II); spermatid (SPD) stages (left); Bar plot showing the grayscale intensity of two types of Lc3a/b and Sqstm1 with  $\beta$ -actin as the internal control (right). NS, not significant; \* $P < 0.05$ ; \*\* $P < 0.01$ ; \*\*\*\* $P < 0.0001$ .

(E) Bar plots showing the relative expression patterns of specific autophagic genes in two subpopulations of human SSCs. The percentage of cells expressing specific genes and  $P$  values in two subpopulations were shown in the plots.

(F) WGCNA showing gene modules derived from 831 and 156 homologous autophagic genes in Figure 1E enriched in each human (top) and mouse (bottom) spermatogenic cell cluster, respectively.

(G) Comparison of phastCons score cumulative distributions of the five gene sets in Figure 1E.

(H) Proportions of four types of genes from 831 mouse- and 156 human-homologous autophagic genes.

**(I)** Bubble plot showing the top five autophagic genes derived from 167 DEGs of 20 mouse-spermatogenic cell clusters in Figure S1G. The size of each circle represents each gene's phastCons score. The gradient of blue to red indicates low to high expression levels.

**A**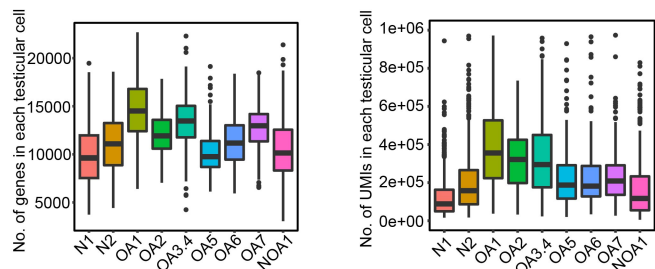**B**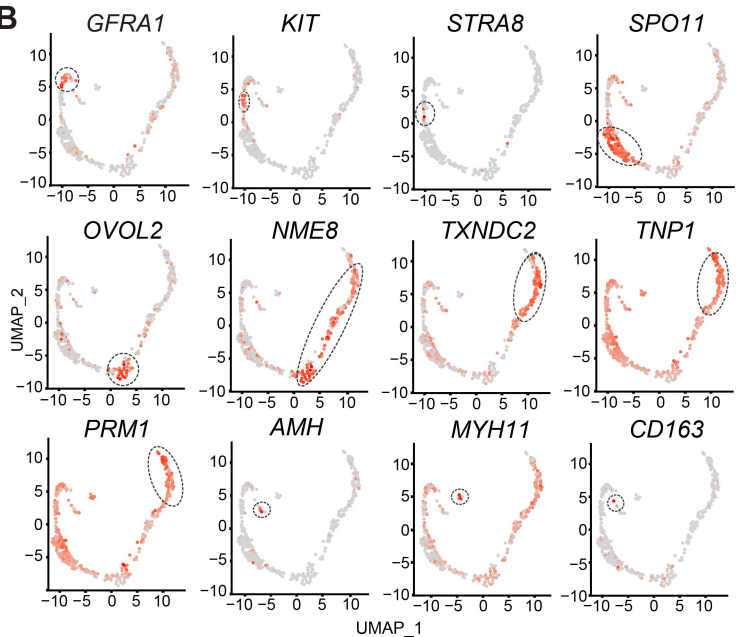**F**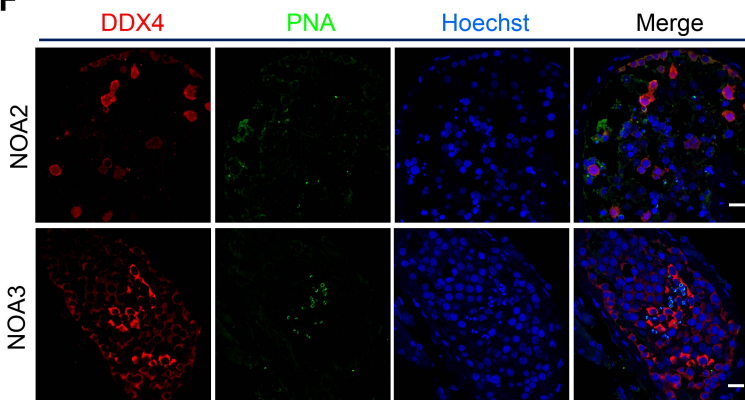**G**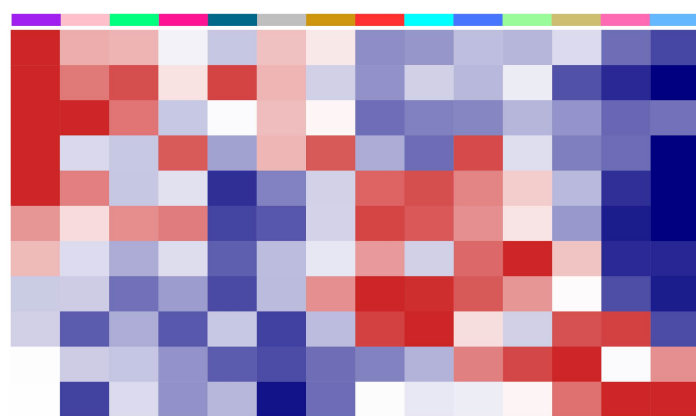**C**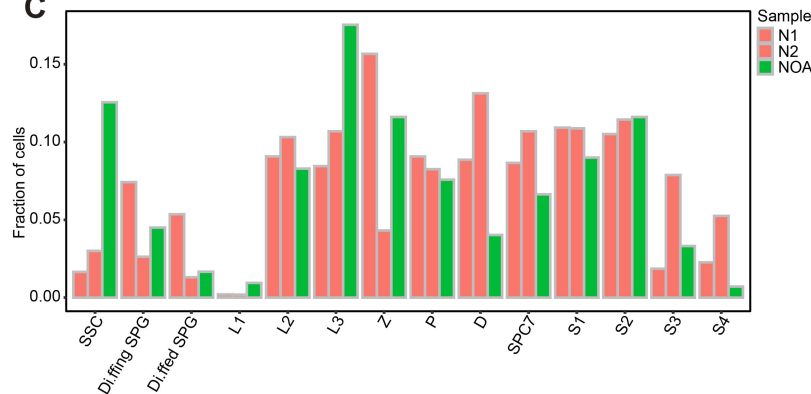**D**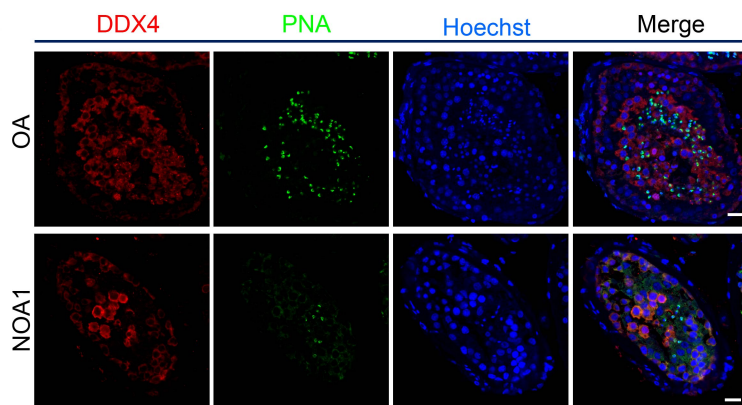**E**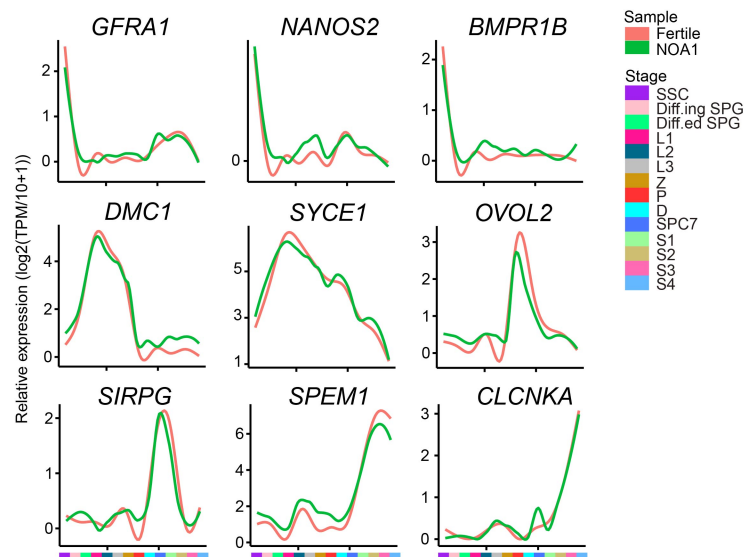**G**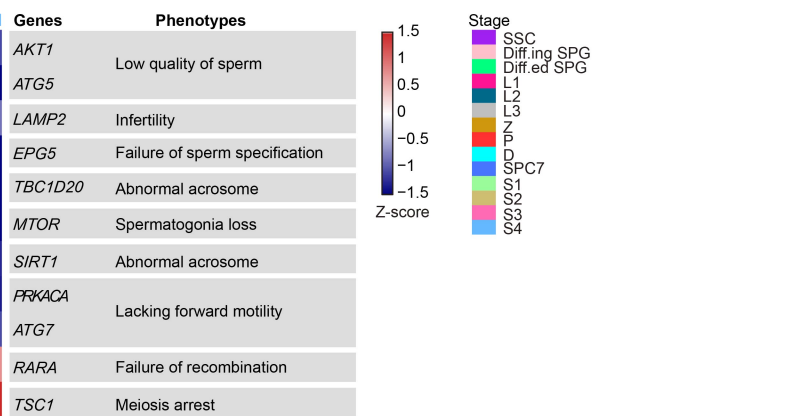

**Figure S2. scRNA-seq analysis of patient NOA1 and immunofluorescence staining of patients NOA2 and NOA3.**

(A) Boxplot of the number of genes and UMIs detected in each single cell from fertile donors and patient NOA1.

(B) Gene expression patterns of marker genes on UMAP plots. The gradient of gray to red indicates low to high expression levels.

(C) Box plot showing the fraction of each germ cell stage from normal persons (N1 and N2) and one NOA patient (NOA1). Spermatogonial stem cell (SSC), differentiating spermatogonia (Diff.ing SPG), differentiated spermatogonia (Diff.ed SPG), leptotene 1 (L1), leptotene 2 (L2), leptotene 3 (L3), zygotene (Z), pachytene (P), diplotene (D), spermatocyte 7 (SPC7), spermatid 1 (S1), spermatid 2 (S2), spermatid 3 (S3), spermatid 4 (S4).

(D) Immunofluorescence of DDX4 (red) co-stained with PNA (green) in adult human testicular paraffin sections from one OA donor as a control (top) and one NOA patient (NOA1, bottom). The scale bars represent 20  $\mu\text{m}$ .

(E) Line chart showing the relative expression patterns of stage-specific germ cell marker genes in each human testicular cell cluster.

(F) Immunofluorescence of DDX4 (red) co-stained with PNA (green) in testicular paraffin sections from NOA2 (left) and NOA3 patients (right). The scale bars represent 20  $\mu\text{m}$ .

(G) Heatmap of autophagic genes related to male infertility throughout human spermatogenesis. The color key from blue to red indicates low to high gene expression levels, respectively.

**A**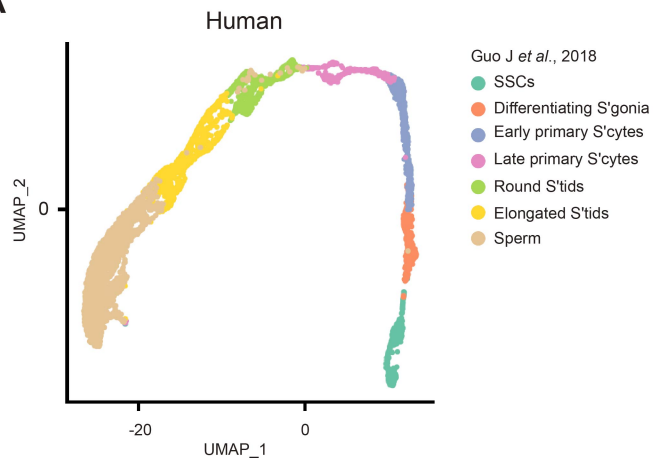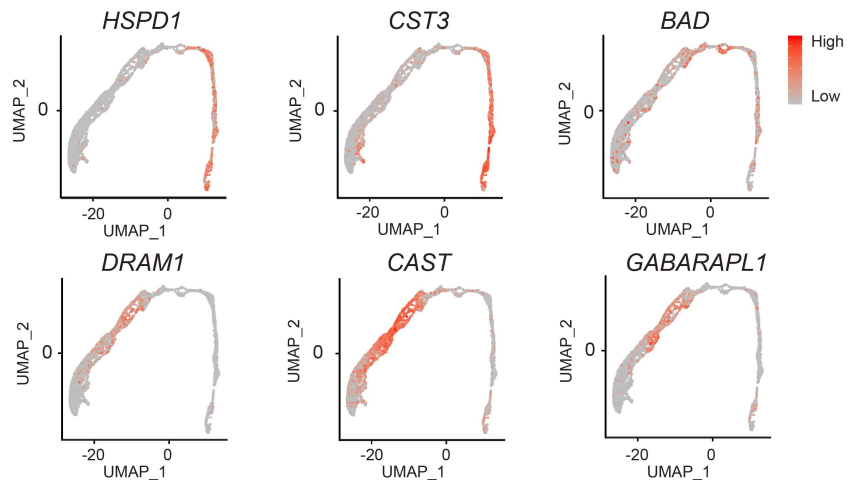**B**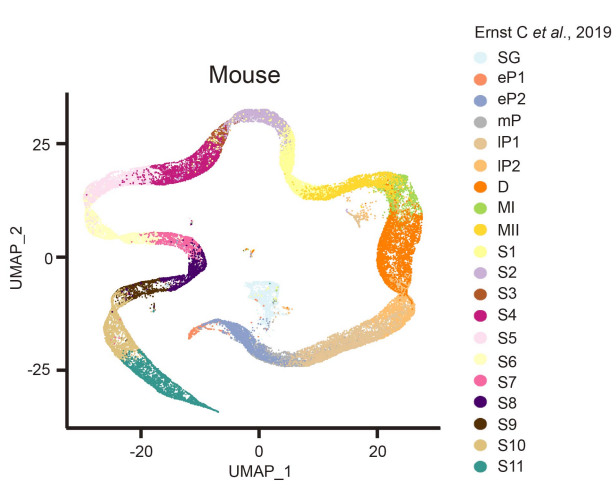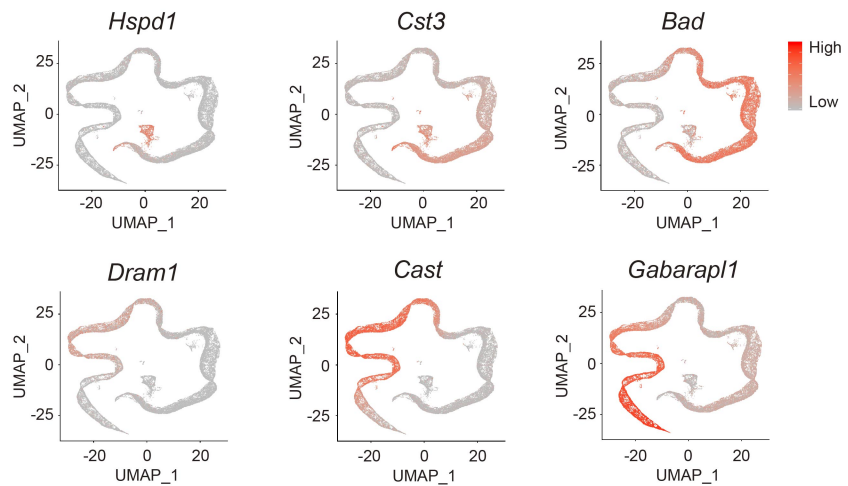

**Figure S3. Validation of the gene expression profiles of autophagic genes using other human and mouse spermatogenesis-associated scRNA-seq datasets.**

(A) UMAP showing the expression pattern of the six autophagic genes of Figure 3B in the human spermatogenesis-associated scRNA-seq dataset (Guo J *et al.*, 2018).

(B) UMAP showing the expression pattern of the six autophagic genes of Figure 3B in the mouse spermatogenesis-associated scRNA-seq dataset (Emst C *et al.*, 2019).



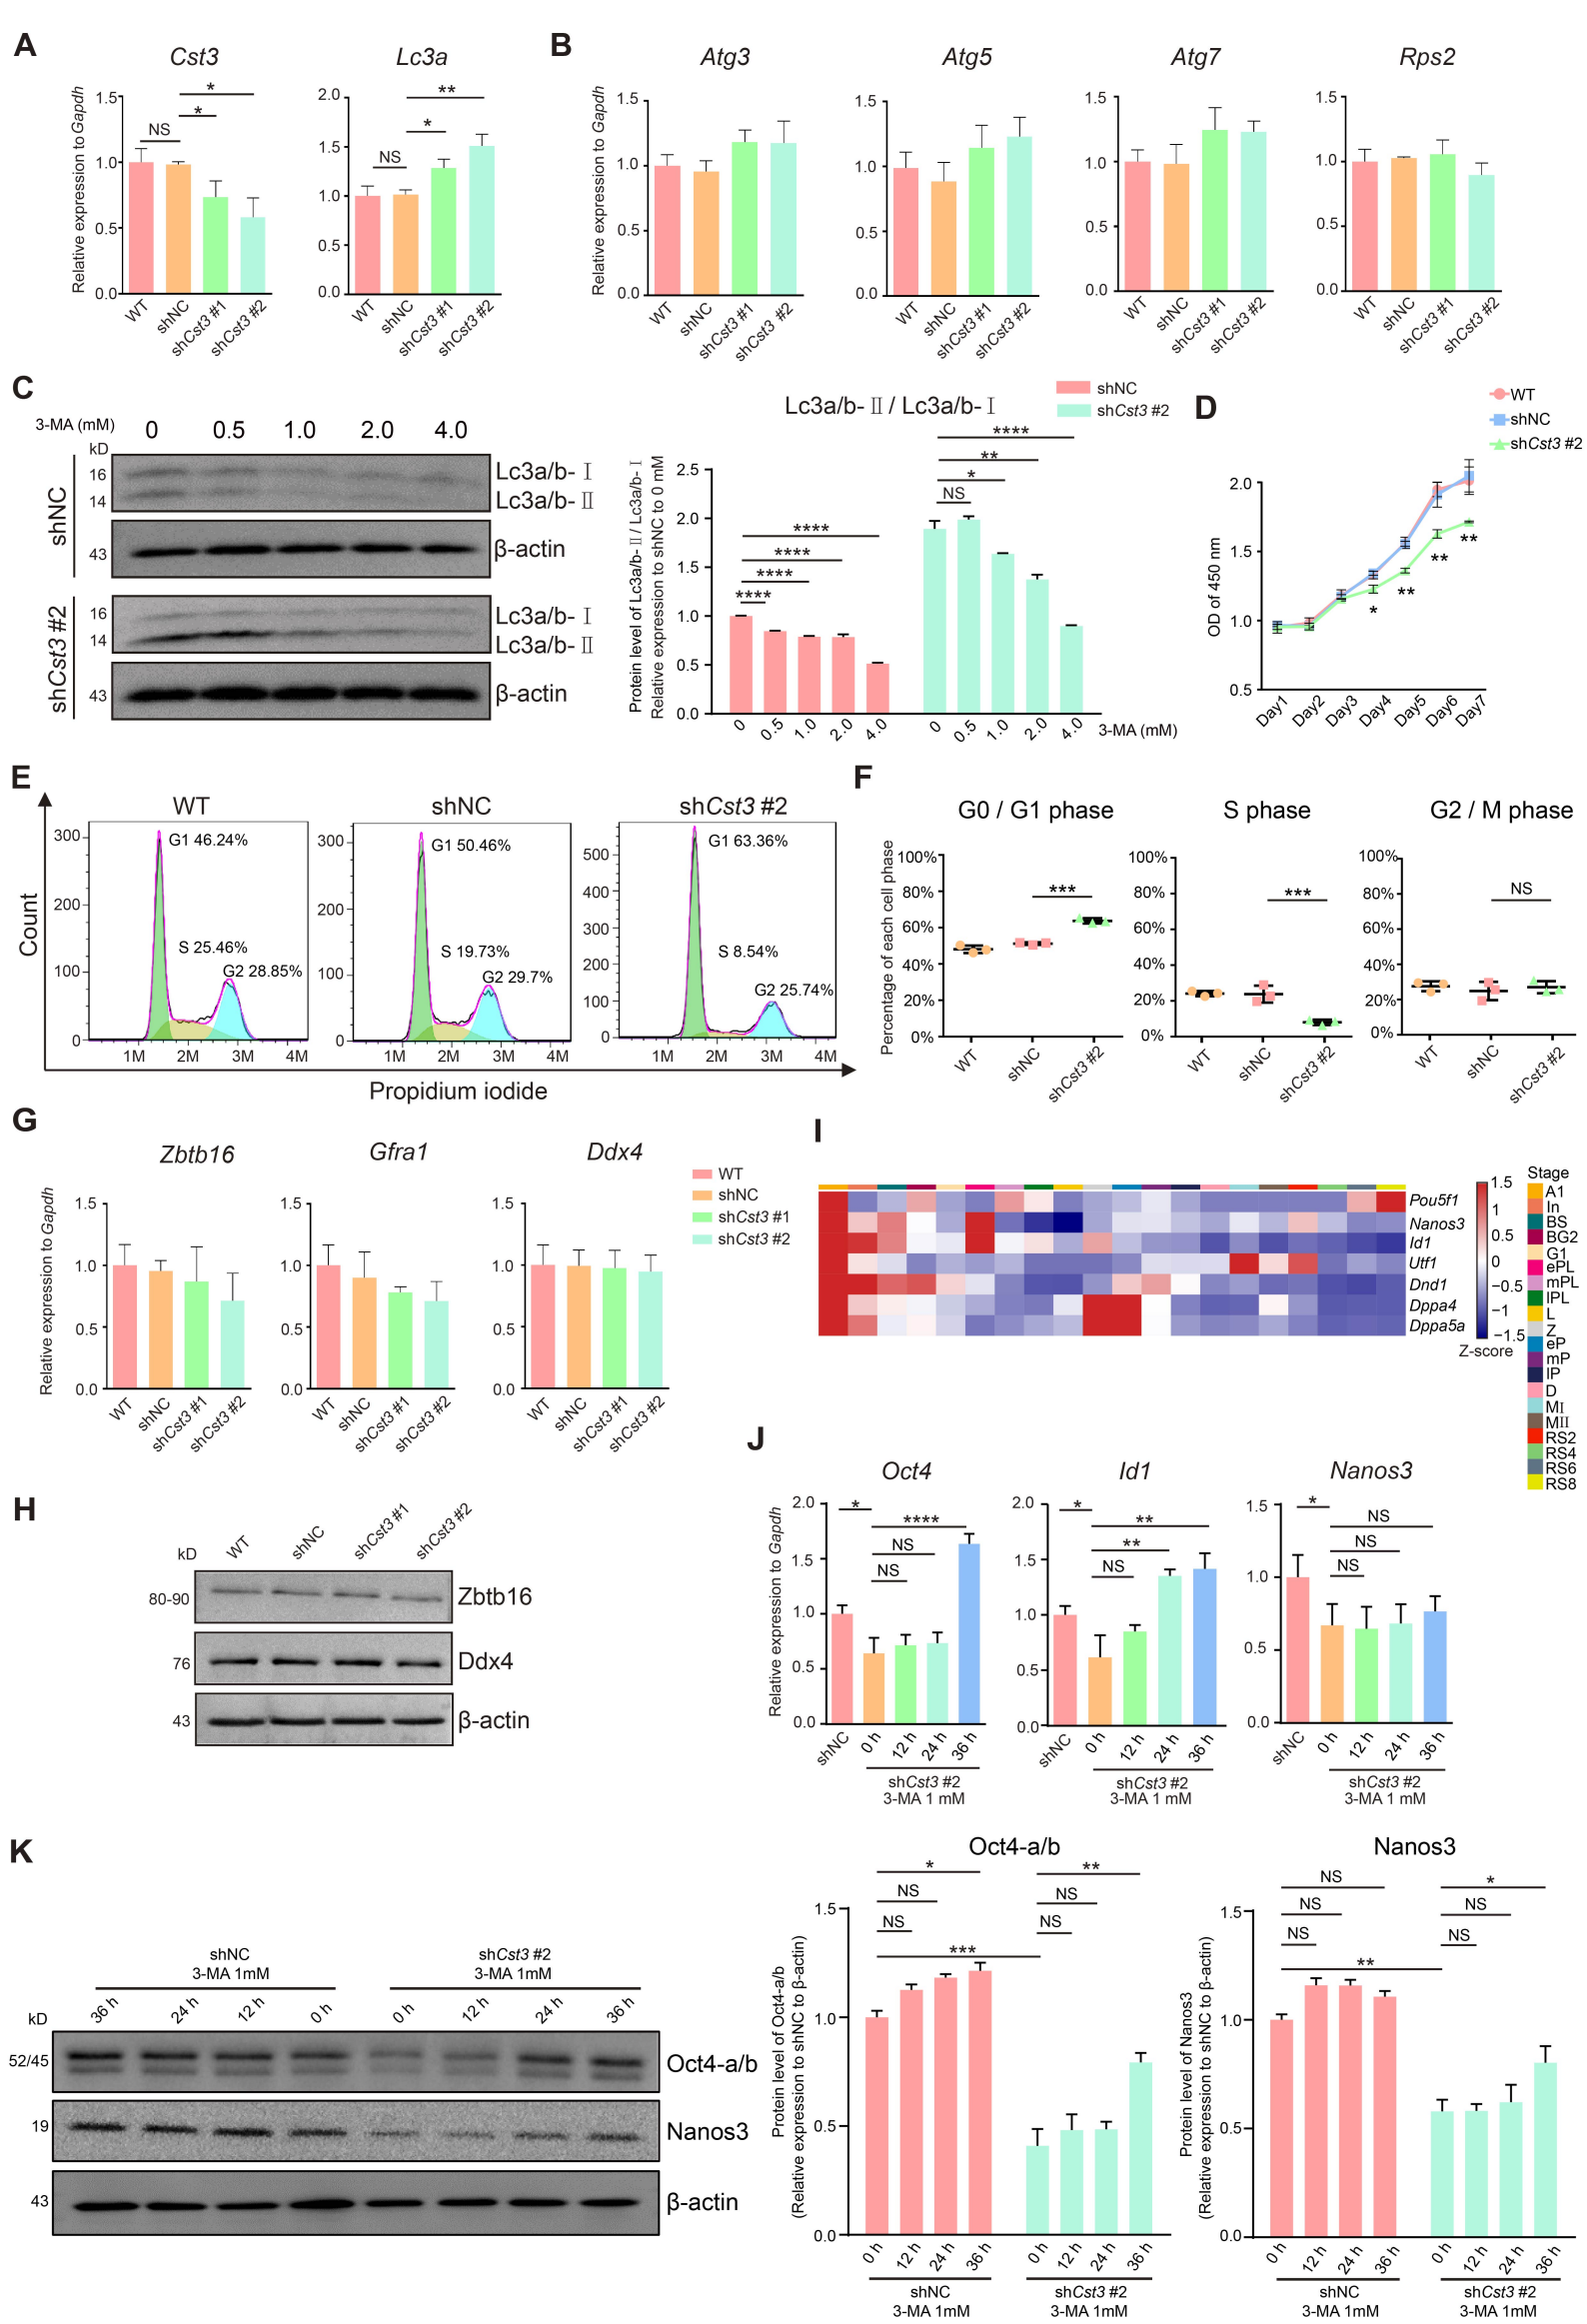



**Figure S4. The expression signatures and maintenance impairment of *Cst3*-KD SSCs.**

(A) Relative expression of *Cst3* and *Lc3a* measured by q-PCR in WT and shNC-, sh*Cst3* #1- and sh*Cst3* #2-transfected mSSCs. NS, not significant; \* $P < 0.05$ ; \*\* $P < 0.01$ .

(B) Relative expression of *Atg3*, *Atg5*, *Atg7* and *Rps2* measured by q-PCR in WT and shNC-, sh*Cst3* #1- and sh*Cst3* #2-transfected mSSCs.

(C) Western blotting analysis of the protein levels of two types of Lc3a/b in shNC- and sh*Cst3* #2-transfected mSSCs treated with different concentrations of 3-MA for 24 h (left). Bar plot showing the grayscale intensity analysis of two types of Lc3a/b, with  $\beta$ -actin as the internal control (right). NS, not significant; \* $P < 0.05$ ; \*\* $P < 0.01$ ; \*\*\*\* $P < 0.0001$ .

(D) Cell proliferation curve determined by CCK-8 assay of WT and shNC- and sh*Cst3* #2-transfected SSCs. \* $P < 0.05$ ; \*\* $P < 0.01$ .

(E) Flow cytometry analysis of the cell cycle in WT and shNC- and sh*Cst3* #2-transfected mSSCs through propidium iodide (PI) staining.

(F) Dot plots showing the percentage of each cell phase of WT and shNC- and sh*Cst3* #2-transfected mSSCs. NS, not significant; \*\*\* $P < 0.001$ .

(G) Relative expression of *Zbtb16*, *Gfra1* and *Ddx4* measured by q-PCR in WT and shNC-, sh*Cst3* #1- and sh*Cst3* #2-transfected mSSCs.

(H) Western blotting analysis showing the protein levels of *Zbtb16* and *Ddx4* in WT and shNC-, sh*Cst3* #1- and sh*Cst3* #2-transfected mSSCs.

(I) Heatmap of genes related to embryonic stem cell (ESC) and SSC maintenance. The color key from blue to red indicates low to high gene expression levels, respectively.

(J) Relative expression of *Oct4*, *Id1* and *Nanos3* measured by q-PCR in shNC-, sh*Cst3* #2-transfected mSSCs and sh*Cst3* #2-transfected SSCs treated with 3-MA. NS, not significant; \* $P < 0.05$ ; \*\* $P < 0.01$ ; \*\*\*\* $P < 0.0001$ .

(K) Western blotting analysis of the protein levels of *Oct4* and *Nanos3* in shNC- and sh*Cst3* #2-transfected SSCs treated with 3-MA (left). Bar plot showing the grayscale intensity analysis of *Oct4* and *Nanos3*, with  $\beta$ -actin as the inner control (right). NS, not significant; \* $P < 0.05$ ; \*\* $P < 0.01$ ; \*\*\* $P < 0.001$ .

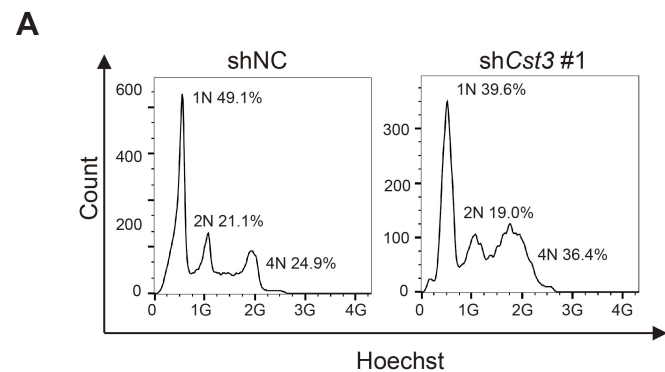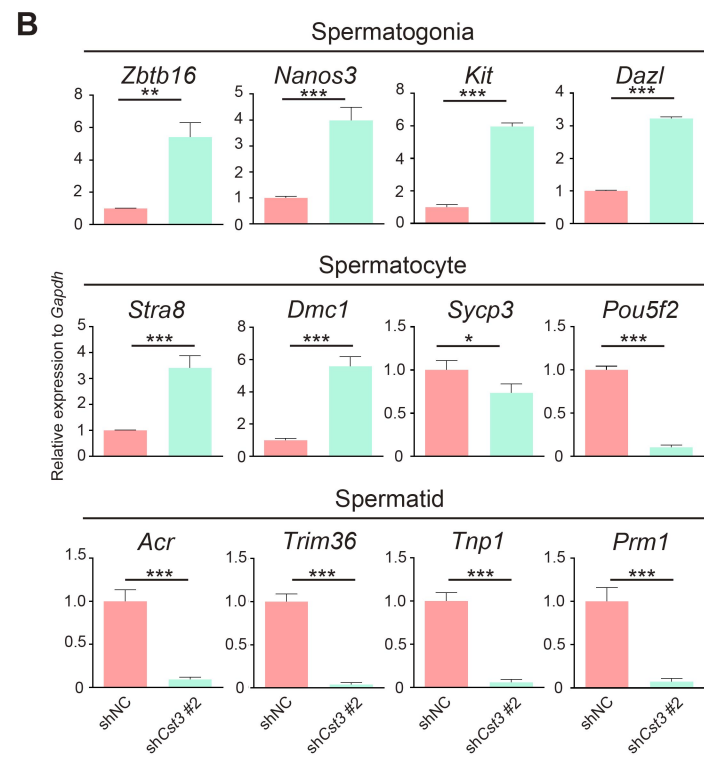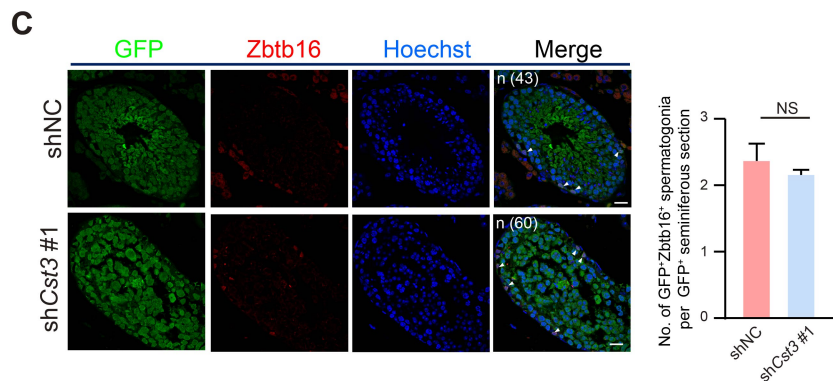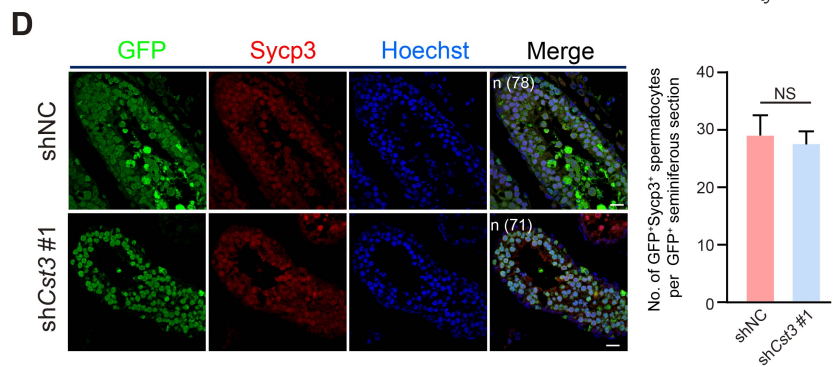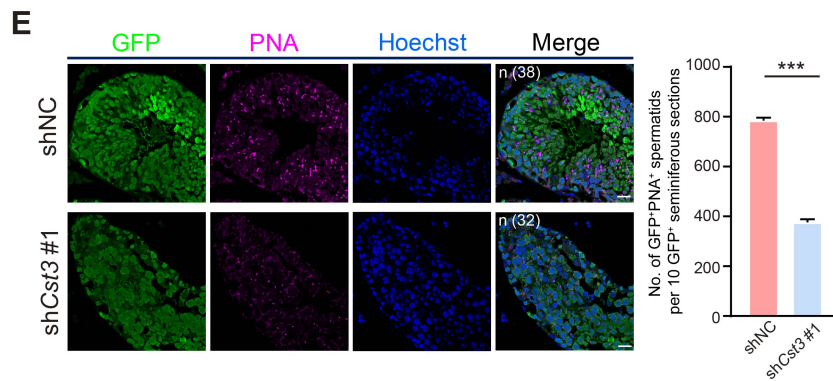

**Figure S5. Confirmation of the involvement of Cst3 in male meiosis in shCst3 #1-transfected SSCs.**

(A) Flow cytometry analysis of the distribution of each ploidy population among the sorted GFP<sup>+</sup> cells after testicular transplantation with shNC- and shCst3 #1-transfected mSSCs labeled with GFP.

(B) Relative expression of specific marker genes by q-PCR in the sorted GFP<sup>+</sup> cells after testicular transplantation with shNC- and shCst3 #2-transfected SSCs labeled with GFP. \* $P < 0.05$ ; \*\* $P < 0.01$ ; \*\*\* $P < 0.001$ .

(C) Immunofluorescence of GFP (green) and Zbtb16 (red) in testicular paraffin sections transplanted with shNC- and shCst3 #1-transfected mSSCs (left). 'n' represents the number of testicular sections calculated in this panel. Triangles indicate double positive SSCs. The scale bars represent 20  $\mu\text{m}$ . Boxplot showing the number of GFP<sup>+</sup>PNA<sup>+</sup> spermatogonia per GFP<sup>+</sup> seminiferous section, NS, not significant (right).

(D) Immunofluorescence of GFP (green) and Sycp3 (red) in testicular paraffin sections transplanted with shNC- and shCst3 #1-transfected mSSCs (left). 'n' represents the number of testicular sections calculated in this panel. The scale bars represent 20  $\mu\text{m}$ . Boxplot showing the number of GFP<sup>+</sup>Sycp3<sup>+</sup> spermatocytes per GFP<sup>+</sup> seminiferous section, NS, not significant (right).

(E) Immunofluorescence of GFP (green) and PNA (pink) in testicular paraffin sections transplanted with shNC- and shCst3 #1-transfected mSSCs (left). 'n' represents the number of testicular sections calculated in this panel. The scale bars represent 20  $\mu\text{m}$ . Boxplot showing the number of GFP<sup>+</sup>PNA<sup>+</sup> spermatids per 10 GFP<sup>+</sup> seminiferous sections, \*\*\* $P < 0.001$  (right).

**Table S1. 1,411 human autophagy-related genes collected from Human Autophagy Database, The Autophagy Database, THANATOS and Human Autophagy Modulators database.**

**Table S2. 709 mouse autophagy-related genes collected from The Autophagy Database and THANATOS.**

**Table S3. Differentially expressed autophagy-related genes between two subpopulations of human SSCs.**

**Table S4. Pearson correlation coefficients (top) and *P*-values (bottom) between gene modules and cell clusters.**

**Table S5. Gene Ontology Analysis to WGCNA modules of 531 human-mouse homologous autophagy-related genes referring to Figure 1F.**

**Table S6. Hub genes evaluated by Protein-protein interaction database (PPI) in each module referring to Figure 1F.**

**Table S7. Differentially expressed homologous autophagy-related genes in human and mouse spermatogenesis among 156 mouse- and 831 human homologous autophagy-related genes, respectively.**

**Table S8. Cell type identification of 432 testicular cells from NOA1 patient.**

**Table S9. Differentially expressed genes of NOA1 patient in each testicular cell cluster.**

**Table S10. Differentially expressed homologous autophagy-related genes in human and mouse spermatogenesis among 531 human-mouse homologous autophagy-related genes.**

**Table S11. Oligonucleotide primer sequences used in q-PCR.**

**Supplemental references 1. References related to Table S1.**

**Supplemental references 2. References related to Table S2.**
